# Supplementary material for: TWJ-Screen: an isothermal screening assay to assess ligand/DNA junction interactions in vitro
Source: PubMed Central journal article supplement — Nucleic Acids Res. 2017 Nov 15;46(3):e16. doi: 10.1093/nar/gkx1118 (PMC5815093; doi:10.1093/nar/gkx1118), 2017-11-15
Supplement: gkx1118_supp.pdf [file gkx1118_supp.pdf]

# TWJ-Screen: an isothermal screening assay to assess ligand/DNA junction interactions *in vitro*.

Ludivine Guyon,<sup>1</sup> Marc Pirrotta,<sup>1</sup> Katerina Duskova,<sup>1</sup> Anton Granzhan,<sup>2</sup>  
Marie-Paule-Teulade-Fichou,<sup>2</sup> and David Monchaud<sup>1,\*</sup>

<sup>1</sup>Institut de Chimie Moléculaire, ICMUB CNRS UMR6302, UBFC Dijon, France.

<sup>2</sup>Institut Curie, PSL Research University, CNRS UMR9187, INSERM U1196, Orsay, France.

## Supplementary Data

### Part 1. Oligonucleotides.

**Sequences** (from 5' to 3'), extinction coefficient ( $\epsilon$ ) values expressed in  $M^{-1}.cm^{-1}$

#### Unlabeled DNA:

**ds26** ( $\epsilon$ : 235200): CAATCGGATCGAATTCGATCCGATTG (*self-complementary sequence*)

**TG5T** ( $\epsilon$ : 67900): TGGGGGT

**PAGE TWJ-S1** ( $\epsilon$ : 131900): CGGAACGGCACTCG

**PAGE TWJ-S2** ( $\epsilon$ : 135200): CGAGTGCAGCGTGG

**PAGE TWJ-S3** ( $\epsilon$ : 118700): CCACGCTCGTTCCG

#### Labeled DNA:

**fam-TWJ-tamra** ( $\epsilon$ : 435500): *fam*-ACTCTTCTCG-TTTTTT-CGAGAGCGAC-TTTTTT-GTCGCAGAGT-*tamra*

**Preparation of the oligonucleotide stock solutions.** The lyophilized strands are firstly diluted in deionized water (18.2  $M\Omega.cm$  resistivity) at 500 $\mu$ M for monomolecular and bimolecular DNA constitutive strands and at 1000 $\mu$ M for trimolecular and tetramolecular DNA constitutive strands. The actual concentration of stock solutions is determined by a dilution to 1 $\mu$ M theoretical concentration and a UV-Vis spectra analysis at 260nm (after 5min at 90°C) using the molar extinction coefficient values provided by the manufacturer (*vide supra*).

**Preparation of the DNA structures.** All DNA structures are prepared in a Caco.K buffer, comprised of 10mM lithium cacodylate buffer (pH 7.2) plus 10mM KCl/90mM LiCl. Monomolecular structures are prepared by mixing the constitutive strand (40 $\mu$ L at 500 $\mu$ M) with lithium cacodylate buffer solution (8 $\mu$ L, 100mM, pH 7.2), plus KCl/LiCl solution (8 $\mu$ L, 100mM/900mM) and water (24 $\mu$ L). Bimolecular structures are prepared by mixing each of the two constitutive strands (40 $\mu$ L, 500 $\mu$ M) with lithium cacodylate buffer solution (16 $\mu$ L, 100mM, pH 7.2), plus KCl/LiCl solution (16 $\mu$ L, 100mM/900mM) and water (48 $\mu$ L). Tetramolecular structures are prepared by mixing each of the four constitutive strands

(20 $\mu$ L, 1000 $\mu$ M) with lithium cacodylate buffer solution (32 $\mu$ L, 100mM, pH 7.2), plus KCl/LiCl solution (32 $\mu$ L, 100mM/900mM) and water (96 $\mu$ L). The final concentrations are theoretically of 250, 125 and 83.3 $\mu$ M for mono-, bi- and tetra-molecular DNA structures respectively. The actual concentration of each DNA is determined via a dilution to 1 $\mu$ M theoretical concentration (expressed in motif concentration) for monomolecular structure (i.e. 4 $\mu$ L in 996 $\mu$ L water), at 1 $\mu$ M for bimolecular structure (i.e. 8 $\mu$ L in 992 $\mu$ L water) and at 0.2 $\mu$ M for tetramolecular structure (i.e. 2.4 $\mu$ L in 997.6 $\mu$ L water), via UV-Vis spectra analysis at 260nm (after 5min at 90 $^{\circ}$ C, baseline correction at 390nm), using the molar extinction coefficient values indicated above.

The high-order DNA structures were folded according to two distinct procedures: i- for the intramolecular architectures, the solutions are heated at 90 $^{\circ}$ C for 5min, cooled in ice for 7h, and then stored at least overnight at 4 $^{\circ}$ C; ii- for the intermolecular structures, the solutions are heated at 90 $^{\circ}$ C for 5min, cooled at 80 $^{\circ}$ C for 10min, 60 $^{\circ}$ C for 30min, 40 $^{\circ}$ C for 30min, 25 $^{\circ}$ C for 4h and then stored at least overnight at 4 $^{\circ}$ C.

## Part 2. Gel electrophoresis.

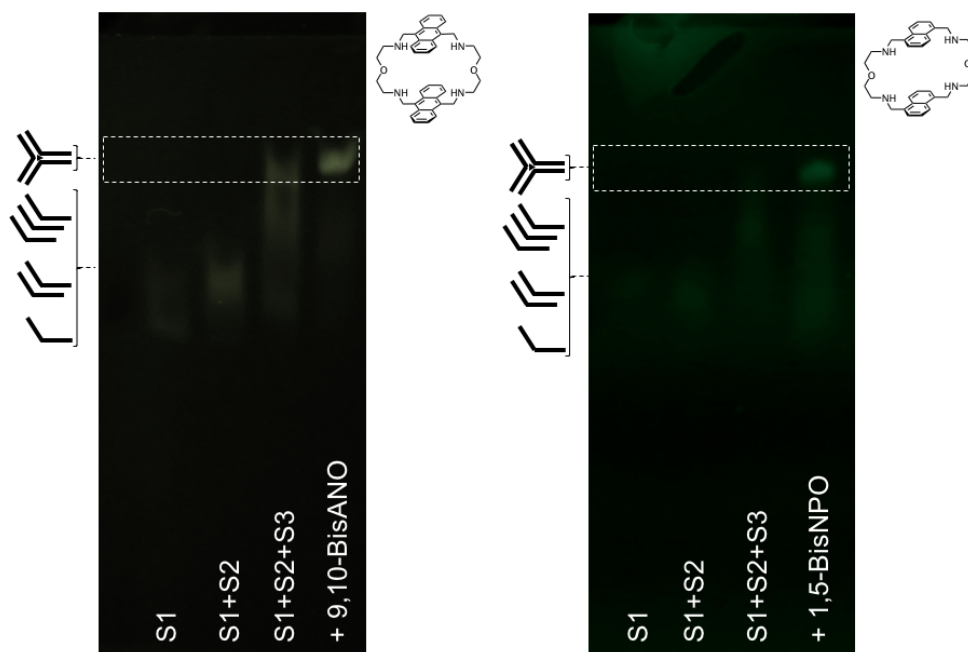

**Figure S1.** Native PAGE analysis (20% polyacrylamide, 1xTBE, 4 $^{\circ}$ C, 1.5hrs, fluorescent visualization ( $\lambda_{ex}$  = 254nm) after post-staining (10min, 25 $^{\circ}$ C) with SYBR<sup>®</sup> Safe) of the three-way junction assembling properties of a panel of 9,10-BisAN-O (left panel) and 1,5-BisNP-O (right panel).

Nondenaturing polyacrylamide gel electrophoresis was carried out with 20% polyacrylamide (AA)-bisacrylamide (BAA) (29:1) gel (including a 6% AA-BAA stacking gel). The “running” gel was prepared as follows: 1.89mL H<sub>2</sub>O, 2.5mL AA-BAA (40%), 0.5mL TB 10X, 50 $\mu$ L MgCl<sub>2</sub> followed by 50 $\mu$ L APS

(100mg/mL) and 15 $\mu$ L TEMED prior to use (5mL final volume); the “stacking” gel was prepared as follows: 1.45mL H<sub>2</sub>O, 300 $\mu$ L AA-BAA (40%), 0.2mL TB 10X, 20 $\mu$ L MgCl<sub>2</sub> followed by 20 $\mu$ L APS (100mg/mL) and 15 $\mu$ L TEMED prior to use (2mL final volume). DNA samples (TWJ-S1, TWJ-S2 and TWJ-S3) and ligands (9,10-BisAN-O and 1,5-BisNP-O) were prepared as 25 $\mu$ M solutions; DNA/ligand mixtures were prepared prior to use in 20 $\mu$ L (final volume) of 1xTB buffer + 10mM MgCl<sub>2</sub> as follows: TWJ-S1 (4 $\mu$ L) + buffer (16 $\mu$ L); TWJ-S1 (4 $\mu$ L) + TWJ-S2 (4 $\mu$ L) + buffer (12 $\mu$ L); TWJ-S1 (4 $\mu$ L) + TWJ-S2 (4 $\mu$ L) + TWJ-S3 (4 $\mu$ L) + buffer (8 $\mu$ L); TWJ-S1 (4 $\mu$ L) + TWJ-S2 (4 $\mu$ L) + TWJ-S3 (4 $\mu$ L) + ligand (4 $\mu$ L) + buffer (4 $\mu$ L). Mixtures were gently stirred for 1h30 at room temperature before being loaded on the gel: samples were prepared mixing 15 $\mu$ L of the previously prepared DNA samples ( $\pm$ ligands) and 3 $\mu$ L of sucrose (15% in H<sub>2</sub>O; w/v). Prior to the migration, gel is submitted to a pre-treatment at 180V for 1.5hr at 4°C. After loading, the electrophoretic migration was performed in 1xTB (tris-borate buffer), pH 8.3, for 1.5hr at 4°C (180V). After the migration, gels were analyzed after a post-staining step (SYBR® Safe solution, 1:10000, 10mn, 25°C under gentle agitation) with a UVP MultiDoc-It® imaging system ( $\lambda_{ex}$  = 254nm).

### Part 3. FRET-melting experiments.

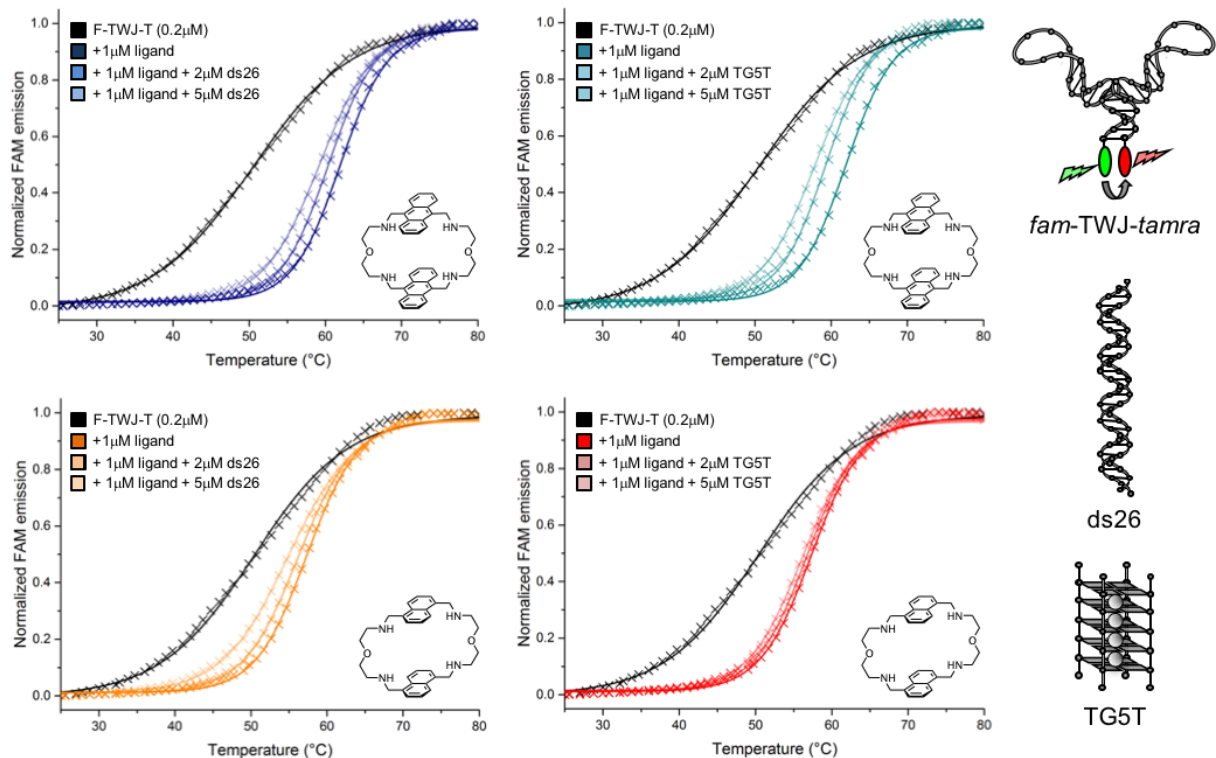

**Figure S2.** FRET-melting experiments performed with 9,10-BisAN-O (upper panels) and 1,5-BisNP-O (lower panels) with *fam-TWJ-tamra* (F-TWJ-T), in absence of presence of competitors, either ds26 (left panels) or TG5T (right panels).

Experiments were performed in a 96-well format using a Mx3005P qPCR machine (Agilent) equipped with a FAM filter ( $\lambda_{ex}$  = 492nm;  $\lambda_{em}$  = 516nm). Experiments were carried out in 100 $\mu$ L (final volume) of

10mM lithium cacodylate buffer (pH 7.2) + 99mM LiCl/1mM KCl, with 0.2 $\mu$ M of labeled DNA and 1.0 $\mu$ M (5equiv.) of ligands (9,10-BisAN-O and 1,5-BisNP-O). Competitive experiments were carried out in 100 $\mu$ L (final volume) of 10mM lithium cacodylate buffer (pH 7.2) + 99mM LiCl/1mM KCl, with labeled DNA (0.2 $\mu$ M), ligands (1.0 $\mu$ M) and increasing amounts (0, 10 and 25equiv.) of unlabeled competitors (ds26 or TG5T). After a first equilibration step (25°C, 30s), a stepwise increase of 1°C every 30s for 65 cycles to reach 90°C was performed, and measurements were made after each cycle. Final data were analyzed with Excel (Microsoft Corp.) and OriginPro®8 (OriginLab Corp.). The emission of *fam* was normalized (0 to 1), and  $T_{1/2}$  was defined as the temperature for which the normalized emission is 0.5;  $\Delta T_{1/2}$  values are means of 2 to 4 experiments.

|              | 1 $\mu$ M | ds26 competitor |            |            |            | TG5T competitor |            |            |            |
|--------------|-----------|-----------------|------------|------------|------------|-----------------|------------|------------|------------|
|              |           | +2 $\mu$ M      | $^{FRET}S$ | +5 $\mu$ M | $^{FRET}S$ | +2 $\mu$ M      | $^{FRET}S$ | +5 $\mu$ M | $^{FRET}S$ |
| 9,10-BisAN-O | 11.3°C    | 9.7°C           | 0.86       | 8.5°C      | 0.75       | 8.6°C           | 0.76       | 7.2°C      | 0.64       |
| 1,5-BisNP-O  | 7.0°C     | 6.0°C           | 0.85       | 4.6°C      | 0.66       | 6.5°C           | 0.93       | 5.9°C      | 0.84       |

**Table S1.** FRET-melting results (expressed as  $\Delta T_{1/2}$  values, in °C) of experiments performed with 9,10-BisAN-O and 1,5-BisNP-O with *fam*-TWJ-*tamra* (F-TWJ-T), in absence of presence of competitors, either ds26 or TG5T.

$$^{FRET}S \text{ is calculated as follows: } ^{FRET}S = \Delta T_{1/2[+ligand+competitor]} / \Delta T_{1/2[+ligand]}$$
